# Supplementary material for: Significant Tumor Regression after Neoadjuvant Chemotherapy in Gastric Cancer, but Poor Survival of the Patient? Role of MHC Class I Alterations
Source: MDPI journal article supplement (doi:10.3390/cancers15030771), 2023-01-26
Supplement: s1 [file s1]

# Supplementary Materials: Significant Tumor Regression after Neoadjuvant Chemotherapy in Gastric Cancer, but Poor Survival of the Patient? Role of MHC Class I Alterations

Theresa Hiltner, Noémi Szörenyi, Meike Kohlruss, Alexander Hapfelmeier, Anna-Lina Herz, Julia Slotta-Huspenina, Moritz Jesinghaus, Alexander Novotny, Sebastian Lange, Katja Ott, Wilko Weichert and Gisela Keller

## 1. Supplementary Methods

### 1.1. Design and cycling conditions of the multiplex PCRs

Multiplex Manager 1.2 was used to virtually design multiplex PCRs [36]. Amplification was performed using a Type-It Microsatellite PCR Kit (Qiagen, Hilden, Germany). DNA (20 ng) was added to each PCR reaction at a final volume of 25 µl. The cycling conditions were as follows: after an initial step of 95°C for 5 min, 32 cycles were performed consisting of denaturation at 95°C for 30 s, annealing at 59°C (markers for chromosome 6p21) or 60°C (markers for chromosome 15q21) for 90 s, extension at 72°C for 30 s, and final extension at 60°C for 30 min.

### 1.2. Determination of individual cut-off values for the definition of AI

Determination of the individual cutoff values for definition of AI for each microsatellite marker was according to previous publications [21,37]. In brief, DNA from 56 non-tumorous tissues from 10 patients was amplified. The range of variation of the amplification of the alleles of each marker was determined by dividing the allele ratio (peak area of the shorter allele divided by the peak area of the longer allele) of the heterozygous markers for each sample. Individual cutoff values were calculated as described in detail previously using the lower and upper bounds (2.5% and 97.5% quantiles) of the bootstrapped two-sided 95% confidence intervals (CI), respectively [37,22]. The lower and upper threshold values for the definition of AI for the microsatellite markers used in this study are included in Supplementary Table S3. A representative dot plot of the amplification variation is shown in Figure S2.

Only informative tumors, which means only patients with a heterozygous genotype for the respective marker, could be evaluated. AI values were calculated by dividing the allele ratio of the normal DNA by the matched tumor DNA [21,38]. Only tumors without microsatellite instability were included in the AI determination. Examples of electropherograms of tumors with and without allelic imbalances at markers on chromosome 6p21 and 15q21 are shown in Figure S3.

## 2. Supplementary Tables

**Table S1.** Chemotherapy regimens.

| Neoadjuvant chemotherapy | n%  |      |
|--------------------------|-----|------|
| Total                    | 158 | 100  |
| Cis + 5-FU               | 119 | 75.3 |
| Ox + 5-FU                | 36  | 22.8 |
| Ox + Cap                 | 3   | 1.9  |

Cis, cisplatin; Ox, oxaliplatin; 5-FU, 5-fluorouracil; Cap, capecitabine;.

**Table S2.** Primer Sequences.

| Marker | Forward Primer | Reverse Primer | Size (bp) | Ref. |
|--------|----------------|----------------|-----------|------|
|        |                |                |           |      |

|                 |                                      |                                |         |      |
|-----------------|--------------------------------------|--------------------------------|---------|------|
| <b>D6S291</b>   | [FAM]CTCAGAG-<br>GATGCCATGTCTAAAATA  | GGGGATGACGAATTATTCAC-<br>TAACT | 198-210 | [39] |
| <b>D6S273</b>   | [HEX] GCAACTTTTCTGTCAATCCA           | ACCAAACCTTCAAATTTTCGG          | 130-140 | [39] |
| <b>D6S265</b>   | [FAM] ACGTTCGTACCCATTAACT            | ATCGAGGTAAACAGCAGAAA           | 122-138 | [40] |
| <b>D6S2872</b>  | [HEX] CACAGCAGGAAAGGGTTGAC           | CCATGAAAAAGTCTGTCCCG           | 150     | [41] |
| <b>D15S508</b>  | [FAM] CTCTGAACTTACCATGCTGG           | CAGTGTAACATTACCCCA             | 159     | [42] |
| <b>D15S1028</b> | [HEX] TGTCTGAAATTCCCAAC              | GAAGTGTGCTCTGTCTC              | 171-187 | [31] |
| <b>D15S119</b>  | [FAM]AACAGAAAATCCG-<br>TAACATAACATA  | ACTTTTGTGCCATTTAGAGATT         | 185-197 | [40] |
| <b>D15S982</b>  | [FAM] ATGTTTAAATTAATAAC-<br>GTGACAGT | GACTTCATCTGGATTCACAA           | 110-138 | [34] |
| <b>D15S117</b>  | [HEX] GCACCAACAACCTATCCCAA           | CCCTAAGGGGTCTCTGAAGA           | 132-150 | [40] |

**Table S3.** Composition of the multiplex PCRs and upper and lower threshold values for the definition of AI.

| Multiplex PCR                         | Marker   | Primer<br>[μM] | Lower threshold<br>value | Upper threshold<br>value |
|---------------------------------------|----------|----------------|--------------------------|--------------------------|
| HLA complex region<br>chromosome 6p21 | D6S291   | 2              | < 0.74                   | > 1.39                   |
|                                       | D6S273   | 2              | < 0.65                   | > 1.24                   |
|                                       | D6S265   | 2              | < 0.66                   | > 1.26                   |
|                                       | D6S2872  | 2              | < 0.80                   | > 1.18                   |
| B2M region<br>chromosome 15q21        | D15S508  | 0.25           | < 0.80                   | > 1.28                   |
|                                       | D15S1028 | 2              | < 0.84                   | > 1.19                   |
|                                       | D15S119  | 1              | < 0.83                   | > 1.16                   |
|                                       | D15S982  | 0.5            | < 0.81                   | > 1.20                   |
|                                       | D15S117  | 2              | < 0.79                   | > 1.17                   |

**Table S4.** AI and clinicopathological characteristics.

| p-values *      |                 |                      |                                                              |                                            |                    |                                 |                                               |                                  |
|-----------------|-----------------|----------------------|--------------------------------------------------------------|--------------------------------------------|--------------------|---------------------------------|-----------------------------------------------|----------------------------------|
| Marker          | Age /<br>median | Sex male<br>/ female | Lauren<br>histotype in-<br>testinal /<br>non-intesti-<br>nal | Localisation<br>proximal /<br>non-proximal | ypT<br>0,1,2 / 3,4 | ypN<br>negative / posi-<br>tive | Metastasis<br>status nega-<br>tive / positive | Resection<br>category R0<br>/ R1 |
| <b>D6S291</b>   | 0.698           | 0.344                | 0.694                                                        | 0.841                                      | 0.097              | 0.045                           | 0.671                                         | 1.000                            |
| <b>D6S273</b>   | 0.251           | 1.000                | 0.706                                                        | 0.121                                      | 0.841              | 0.845                           | 1.000                                         | 1.000                            |
| <b>D6S265</b>   | 0.569           | 0.065                | 1.000                                                        | 0.421                                      | 0.552              | 0.564                           | 1.000                                         | 0.618                            |
| <b>D6S2872</b>  | 0.106           | 0.801                | 1.000                                                        | 0.055                                      | 0.286              | 0.687                           | 1.00                                          | 0.799                            |
| <b>D15S508</b>  | 1.000           | 0.767                | 1.00                                                         | 0.242                                      | 0.587              | 0.430                           | 0.782                                         | 0.019                            |
| <b>D15S1028</b> | 0.846           | 0.346                | 0.560                                                        | 0.008                                      | 0.686              | 0.421                           | 1.000                                         | 0.623                            |
| <b>D15S119</b>  | 0.316           | 0.340                | 0.070                                                        | 0.023                                      | 0.056              | 0.840                           | 0.830                                         | 1.000                            |
| <b>D15S982</b>  | 1.000           | 1.000                | 1.000                                                        | 0.169                                      | 0.552              | 0.121                           | 0.834                                         | 0.624                            |
| <b>D15S117</b>  | 0.112           | 0.216                | 0.601                                                        | 1.000                                      | 0.358              | 0.722                           | 0.324                                         | 0.824                            |

\* Chi-squared or Fisher exact test.

**Table S5.** Survival data and AI of all patients (n=158).

| Marker   | AI status | OS median (months)<br>(95% CI) | HR (95% CI)      | p- value* |
|----------|-----------|--------------------------------|------------------|-----------|
| D6S291   | yes       | 37.90 (0.00 – 82.34)           | 0.88 (0.52-1.51) | 0.652     |
|          | no        | 61.20 (26.75-95.65)            | 1                |           |
| D6S273   | yes       | 66.00 (20.78-111.22)           | 1.06 (0.63-1.77) | 0.826     |
|          | no        | 57.80 (30.92-84.69)            | 1                |           |
| D6S265   | yes       | 38.03 (10.63-65.43)            | 1.25 (0.74-2.12) | 0.397     |
|          | no        | 66.00 (49.14-82.86)            | 1                |           |
| D6S2872  | yes       | 31.34 (16.31-46.38)            | 1.65 (0.93-2.91) | 0.087     |
|          | no        | 66.10 (47.86-84.34)            | 1                |           |
| D15S508  | yes       | 61.2 (15.28-107.12)            | 1.00 (0.47-2.11) | 1.000     |
|          | no        | 44.62 (2.13-87.16)             | 1                |           |
| D15S1028 | yes       | 62.23 (20.16-104.30)           | 1.09 (0.63-1.88) | 0.769     |
|          | no        | 66.10 (38.70-93.50)            | 1                |           |
| D15S119  | yes       | 66.00 (36.11-95.90)            | 0.83 (0.48-1.42) | 0.498     |
|          | no        | 31.90 (20.61-43.12)            | 1                |           |
| D15S982  | yes       | 48.10 (20.26-75.94)            | 1.15 (0.68-1.93) | 0.599     |
|          | no        | 36.6 (1.48-71.72)              | 1                |           |
| D15S117  | yes       | 31.34 (9.86-52.83)             | 1.63 (0.97-2.72) | 0.063     |
|          | no        | 69.93                          | 1                |           |

AI, allelic imbalance; OS, overall survival; HR, hazard ratio; CI, confidence interval. \* p univariable Cox regression model

### 3. Supplementary Figures

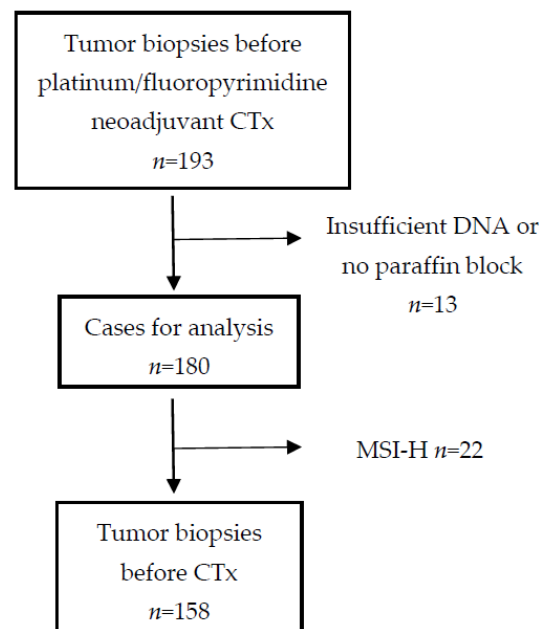**Figure S1.** Overview of the study enrolment.

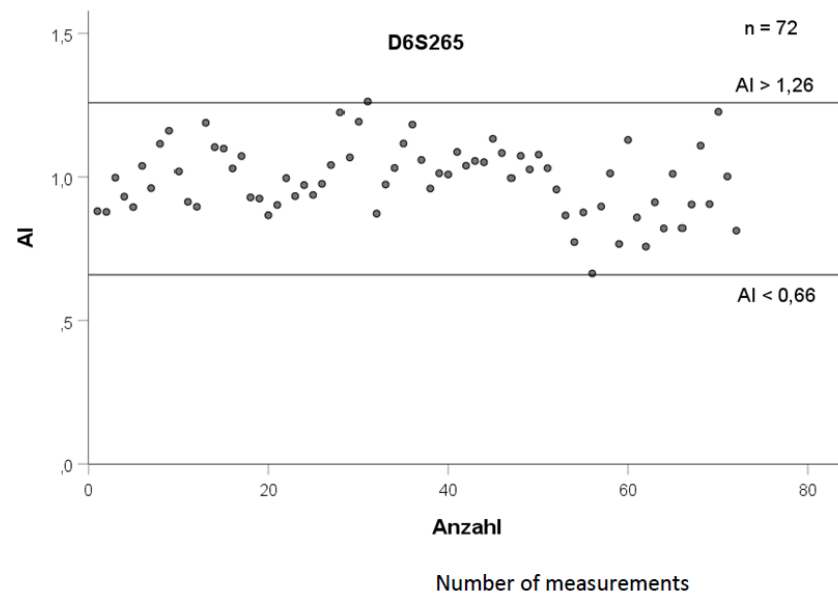

**Figure S2.** Dot plot of the AI values of marker D6S265 for the cut-off determination. Representative example of a dot plot showing the range of variation of amplification for marker D6S265. Variation was determined by dividing the allele ratio (peak area of the shorter allele divided by the peak area of the longer allele) of the heterozygous markers for each sample. Individual cutoff values were calculated using the lower and upper bounds (2.5% and 97.5% quantiles) of the bootstrapped two-sided 95% confidence intervals (CI), respectively and are indicated by a line.

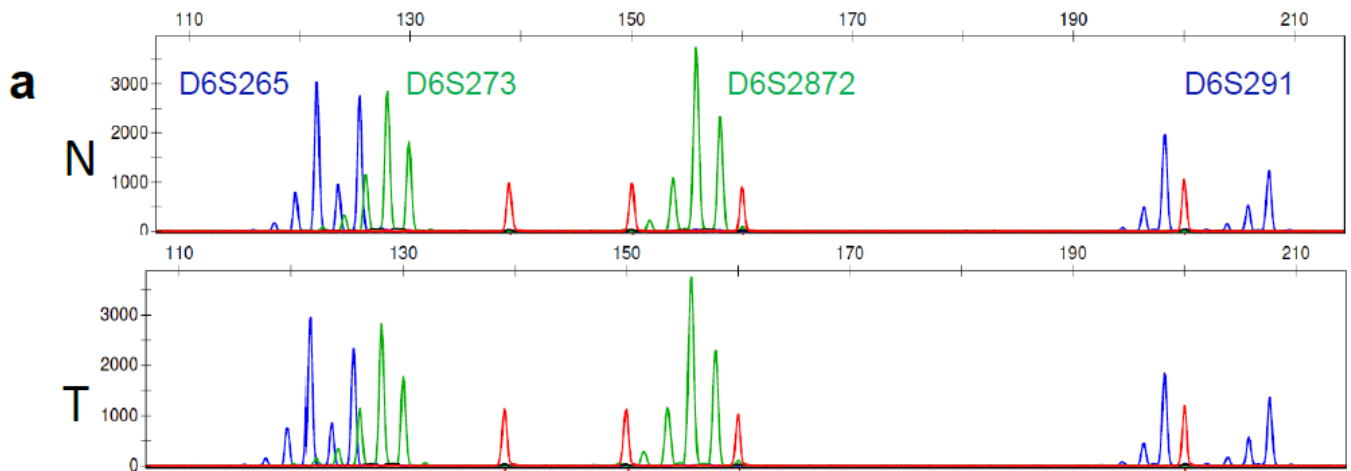

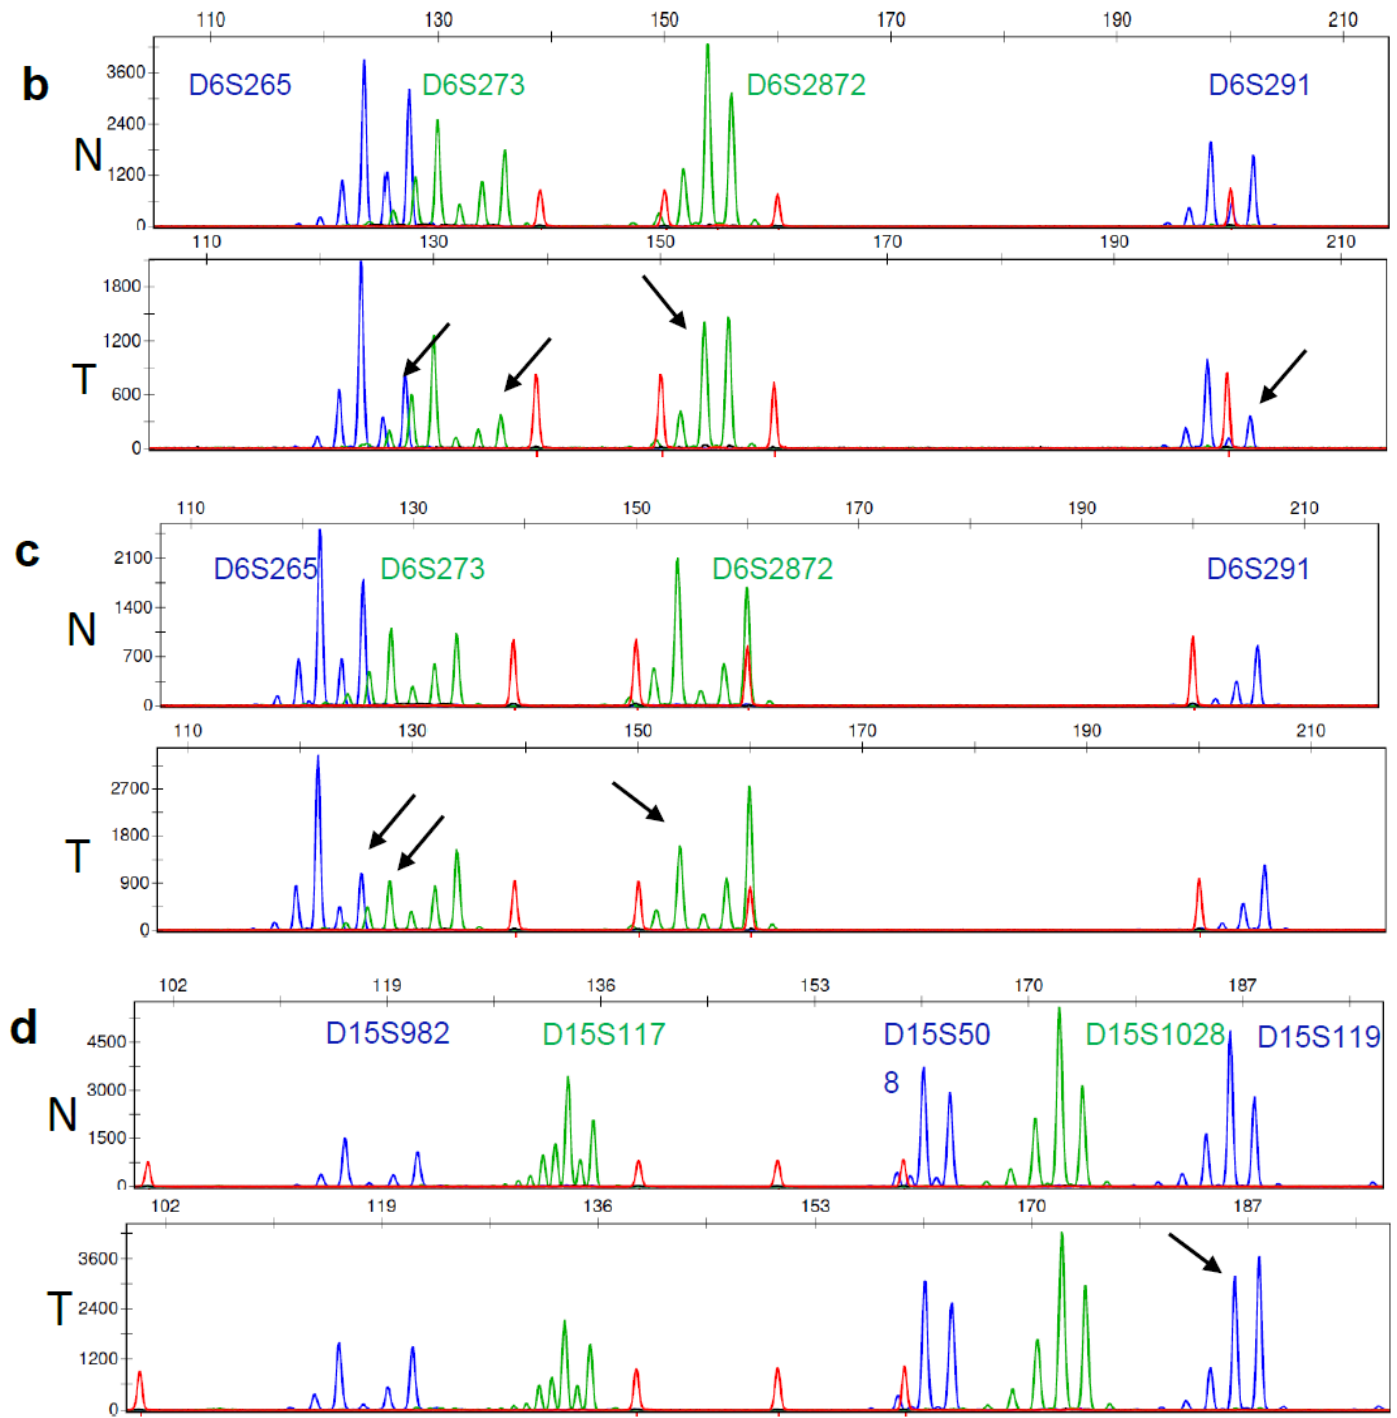

**Figure S3.** Capillary electrophoresis results of allelic imbalance using microsatellite markers amplified by multiplex PCRs. Electropherograms of the microsatellite patterns are shown exemplarily for multiplex PCRs of tumor specimen (T) and the corresponding non-tumorous tissue (N) of the four microsatellite markers spanning chromosome 6p21 (D6S291, D6S273, D6S265, D6S2872) (a – c) and of the five microsatellite markers spanning chromosome 15q21 (D15S508, D15S1028, D15S119, D15S982, D15S117). Examples of tumors without allelic imbalance (a) and with allelic imbalances (arrows) at chromosome 6p21 (b,c) and at chromosome 15q21 (d) are shown. FAM (blue) and HEX (green) refer to the fluorescence-tagged fragments of the respective microsatellite marker. The red peaks are internal size standards. The x-axis displays the size in bases and the y-axis the respective fluorescence intensity.
